# Supplementary material for: Structural Features and Synteny Analysis of the Sea Buckthorn Mitochondrial Genome
Source: Research Square preprint supplement (doi:10.21203/rs.3.rs-5607252/v1), 2025-04-23
Supplement: Supplementary file 1 [file 9d3f03723a62824d1b666f4a.xlsx]

## Sheet: Sheet1
原始数据
物种	bioproject	biosample	sra(二代)	sra(三代)
Hippophae rhamnoides L.	PRJNA1159506	SAMN43577436	SRR30634433	SRR30634434
线粒体基因组序列
物种	登录号
	chromosome1	chromosome2
Hippophae rhamnoides L.	PQ309694	PQ309695

## Sheet: Library and Platform Terms
Strategy
WGA	Random sequencing of the whole genome following non-pcr amplification
WGS	Random sequencing of the whole genome
WXS	Random sequencing of exonic regions selected from the genome
RNA-Seq	Random sequencing of whole transcriptome
miRNA-Seq	Random sequencing of small miRNAs
WCS	Random sequencing of a whole chromosome or other replicon isolated from a genome
CLONE	Genomic clone based (hierarchical) sequencing
POOLCLONE	Shotgun of pooled clones (usually BACs and Fosmids)
AMPLICON	Sequencing of overlapping or distinct PCR or RT-PCR products
CLONEEND	Clone end (5', 3', or both) sequencing
FINISHING	Sequencing intended to finish (close) gaps in existing coverage
ChIP-Seq	Direct sequencing of chromatin immunoprecipitates
MNase-Seq	Direct sequencing following MNase digestion
DNase-Hypersensitivity	Sequencing of hypersensitive sites, or segments of open chromatin that are more readily cleaved by DNaseI
Bisulfite-Seq	Sequencing following treatment of DNA with bisulfite to convert cytosine residues to uracil depending on methylation status
Tn-Seq	Sequencing from transposon insertion sites
EST	Single pass sequencing of cDNA templates
FL-cDNA	Full-length sequencing of cDNA templates
CTS	Concatenated Tag Sequencing
MRE-Seq	Methylation-Sensitive Restriction Enzyme Sequencing strategy
MeDIP-Seq	Methylated DNA Immunoprecipitation Sequencing strategy
MBD-Seq	Direct sequencing of methylated fractions sequencing strategy
Synthetic-Long-Read
ATAC-seq	Assay for Transposase-Accessible Chromatin (ATAC) strategy is used to study genome-wide chromatin accessibility. alternative method to DNase-seq that uses an engineered Tn5 transposase to cleave DNA and to integrate primer DNA sequences into the cleaved genomic DNA
ChIA-PET	Direct sequencing of proximity-ligated chromatin immunoprecipitates.
FAIRE-seq	Formaldehyde Assisted Isolation of Regulatory Elements. reveals regions of open chromatin
Hi-C	Chromosome Conformation Capture technique where a biotin-labeled nucleotide is incorporated at the ligation junction, enabling selective purification of chimeric DNA ligation junctions followed by deep sequencing
ncRNA-Seq	Capture of other non-coding RNA types, including post-translation modification types such as snRNA (small nuclear RNA) or snoRNA (small nucleolar RNA), or expression regulation types such as siRNA (small interfering RNA) or piRNA/piwi/RNA (piwi-interacting RNA).
RAD-Seq
RIP-Seq	Direct sequencing of RNA immunoprecipitates (includes CLIP-Seq, HITS-CLIP and PAR-CLIP).
SELEX	Systematic Evolution of Ligands by EXponential enrichment
ssRNA-seq	strand-specific RNA sequencing
Targeted-Capture
Tethered Chromatin Conformation Capture
OTHER	Library strategy not listed (please include additional info in the “design description”)
Source
GENOMIC	Genomic DNA (includes PCR products from genomic DNA)
TRANSCRIPTOMIC	Transcription products or non genomic DNA (EST, cDNA, RT-PCR, screened libraries)
METAGENOMIC	Mixed material from metagenome
METATRANSCRIPTOMIC	Transcription products from community targets
SYNTHETIC	Synthetic DNA
VIRAL RNA	Viral RNA
GENOMIC SINGLE CELL
TRANSCRIPTOMIC SINGLE CELL
OTHER	Other, unspecified, or unknown library source material (please include additional info in the “design description”)
Selection
RANDOM	Random selection by shearing or other method
PCR	Source material was selected by designed primers
RANDOM PCR	Source material was selected by randomly generated primers
RT-PCR	Source material was selected by reverse transcription PCR
HMPR	Hypo-methylated partial restriction digest
MF	Methyl Filtrated
CF-S	Cot-filtered single/low-copy genomic DNA
CF-M	Cot-filtered moderately repetitive genomic DNA
CF-H	Cot-filtered highly repetitive genomic DNA
CF-T	Cot-filtered theoretical single-copy genomic DNA
MDA	Multiple displacement amplification
MSLL	Methylation Spanning Linking Library
cDNA	complementary DNA
ChIP	Chromatin immunoprecipitation
MNase	Micrococcal Nuclease (MNase) digestion
DNAse	Deoxyribonuclease (MNase) digestion
Hybrid Selection	Selection by hybridization in array or solution
Reduced Representation	Reproducible genomic subsets, often generated by restriction fragment size selection, containing a manageable number of loci to facilitate re-sampling
Restriction Digest	DNA fractionation using restriction enzymes
5-methylcytidine antibody	Selection of methylated DNA fragments using an antibody raised against 5-methylcytosine or 5-methylcytidine (m5C)
MBD2 protein methyl-CpG binding domain	Enrichment by methyl-CpG binding domain
CAGE	Cap-analysis gene expression
RACE	Rapid Amplification of cDNA Ends
size fractionation	Physical selection of size appropriate targets
Padlock probes capture method	Circularized oligonucleotide probes
other	Other library enrichment, screening, or selection process (please include additional info in the “design description”)
unspecified	Library enrichment, screening, or selection is not specified (please include additional info in the “design description”)
cDNA_oligo_dT
cDNA_randomPriming
Inverse rRNA	depletion of ribosomal RNA by oligo hybridization.
Oligo-dT	enrichment of messenger RNA (mRNA) by hybridization to Oligo-dT.
PolyA	PolyA selection or enrichment for messenger RNA (mRNA); should replace cDNA enumeration.
repeat fractionation	Selection for less repetitive (and more gene rich) sequence through Cot filtration (CF) or other fractionation techniques based on DNA kinetics.
Platforms
_LS454	_LS454	ILLUMINA	HELICOS	ABI_SOLID	COMPLETE_GENOMICS	PACBIO_SMRT	ION_TORRENT	CAPILLARY	OXFORD_NANOPORE	BGISEQ
ABI_SOLID	454 GS	HiSeq X Five	Helicos HeliScope	AB 5500 Genetic Analyzer	Complete Genomics	PacBio RS	Ion Torrent PGM	AB 310 Genetic Analyzer	GridION	BGISEQ-500
BGISEQ	454 GS 20	HiSeq X Ten		AB 5500xl Genetic Analyzer		PacBio RS II	Ion Torrent Proton	AB 3130 Genetic Analyzer	MinION	BGISEQ-500
CAPILLARY	454 GS FLX	Illumina Genome Analyzer		AB 5500x-Wl Genetic Analyzer		PacBio Sequel	Ion Torrent S5 XL	AB 3130xL Genetic Analyzer	PromethION	DNBSEQ-G400
COMPLETE_GENOMICS	454 GS FLX+	Illumina Genome Analyzer II		AB SOLiD 3 Plus System		PacBio Sequel II	Ion Torrent S5	AB 3500 Genetic Analyzer		DNBSEQ-T7
HELICOS	454 GS FLX Titanium	Illumina Genome Analyzer IIx		AB SOLiD 4 System			Ion Torrent Genexus	AB 3500xL Genetic Analyzer		DNBSEQ-G50
ILLUMINA	454 GS Junior	Illumina HiScanSQ		AB SOLiD 4hq System				AB 3730 Genetic Analyzer		MGISEQ-2000RS
ION_TORRENT		Illumina HiSeq 1000		AB SOLiD PI System				AB 3730xL Genetic Analyzer
OXFORD_NANOPORE		Illumina HiSeq 1500		AB SOLiD System
PACBIO_SMRT		Illumina HiSeq 2000		AB SOLiD System 2.0
		Illumina HiSeq 2500		AB SOLiD System 3.0
		Illumina HiSeq 3000
		Illumina HiSeq 4000
		Illumina iSeq 100
		Illumina NovaSeq 6000
		Illumina MiniSeq
		Illumina MiSeq
		NextSeq 500
		NextSeq 550
		NextSeq 1000
		NextSeq 2000
		Illumina HiSeq X
